# Supplementary material
Source: PubMed Central journal article supplement (PMC4408417)
Supplement: supp_msv035_suppl_data.pdf [file supp_msv035_suppl_data.pdf]

## Supplemental Information

Table S1: BUSTED false positive rates on null simulations from Murrell et al. (2012b).  $N$  is the number of sequences used in the simulation. All alignments were simulated with 250 codon sites. BUSTED was conservative on average.

| $N$ | BUSTED at $p \leq 0.05$ |
|-----|-------------------------|
| 8   | 0.00                    |
| 16  | 0.025                   |
| 32  | 0.025                   |
| 64  | 0.05                    |
| 128 | 0.025                   |
